# Supplementary material for: Term Human Placental Trophoblasts Express SARS-CoV-2 Entry Factors ACE2, TMPRSS2, and Furin
Source: PubMed Central journal article supplement (PMC8546705; doi:10.1128/msphere.00250-21), 2021-04-14
Supplement: msphere.00250-21-st001.pdf [file msphere.00250-21-st001.pdf]

1 **SUPPLEMENTAL MATERIAL: Term human placental trophoblasts express SARS-CoV-2**  
2 **entry factors ACE2, TMPRSS2, and furin**

3

4 Yingshi Ouyang, Tarique Bagalkot, Wendy Fitzgerald, Elena Sadovsky, Tianjiao Chu, Ana  
5 Martínez-Marchal, Miguel Brieño-Enríquez, Emily J. Su, Leonid Margolis, Alexander Sorkin,  
6 Yoel Sadovsky

7

8 **Table S1.** Primers used in the studies.

| <b>Name</b> | <b>Direction</b> | <b>ID</b>    | <b>Sequence</b>        |
|-------------|------------------|--------------|------------------------|
| ACE2        | Forward          | NM_021804    | CGAAGCCGAAGACCTGTTCTA  |
|             | Reverse          |              | GGGCAAGTGTGGACTGTTCC   |
| Furin       | Forward          | NM_002569    | CCTGGTTGCTATGGGTGGTAG  |
|             | Reverse          |              | AAGTGGTAATAGTCCCCGAAGA |
| TMPRSS2     | Forward          | NM_001135099 | GTCCCCACTGTCTACGAGGT   |
|             | Reverse          |              | CAGACGACGGGGTTGGAAG    |
| GAPDH       | Forward          | NM_002046.7  | GAAGGTCCGAGTCAACGGATTT |
|             | Reverse          |              | GAATTTGCCATGGGTGGAAT   |

9
